# Supplementary material
Source: HighWire-hosted journal article supplement (https://cmajopen.ca/highwire/filestream/88766/field_highwire_adjunct_files/0/open-2021-0295-1-at.pdf)

## Appendix I

**Table S1: Data elements for studying the OHIP+ trends of publicly covered prescription utilization and expenditures**

| Data Element                                                           | Definition                                                                                                                                                                                                                                                                                                                                                                                                                                                                                                                                             |
|------------------------------------------------------------------------|--------------------------------------------------------------------------------------------------------------------------------------------------------------------------------------------------------------------------------------------------------------------------------------------------------------------------------------------------------------------------------------------------------------------------------------------------------------------------------------------------------------------------------------------------------|
| Calendar Year/month                                                    | The calendar year and month during which a claim was dispensed.                                                                                                                                                                                                                                                                                                                                                                                                                                                                                        |
| Province                                                               | The provincial/jurisdiction responsible for financing the claim: <ul style="list-style-type: none"> <li>• Ontario (ON)</li> <li>• British Columbia (BC)</li> </ul>                                                                                                                                                                                                                                                                                                                                                                                     |
| Program Group                                                          | See Plans and Programs in the NPDUIS Database section for more detail<br>A drug benefits plan/program to which the claim was submitted for payment.                                                                                                                                                                                                                                                                                                                                                                                                    |
| Neighborhood Income Quintile                                           | A grouping by the neighborhood income quintile (based on national distribution) associated with patient postal code. That is, Quintile 1 (Lowest income), 2, 3, 4, 5 (Highest Income), and 9 (Missing).                                                                                                                                                                                                                                                                                                                                                |
| Patient Sex                                                            | The sex of the patient at the time of claim, and grouped as male, female, other.                                                                                                                                                                                                                                                                                                                                                                                                                                                                       |
| Patient Age Category                                                   | The age of the patient at the time of claim (service date), grouped as 0-17, 18-25.                                                                                                                                                                                                                                                                                                                                                                                                                                                                    |
| ATC level 5 code/description (only for diabetic and respiratory drugs) | An ATC code and English description is defined by the WHO Collaborative Centre for Drug Statistics Methodology and is assigned by Health Canada at the product level. Chemical substance — indicated by the full 7 characters of the ATC code.                                                                                                                                                                                                                                                                                                         |
| PDIN flag (only for diabetic and respiratory drugs)                    | A flag that indicates whether the product is listed as a pseudo-drug identification number (PDIN). The drug identification number (DIN) or pseudo-DIN (PDIN) identifies drug products sold in a dosage form in Canada. DINs are assigned by Health Canada, and PDINs are assigned by the plan/program.<br>If the PDIN Flag is Y, the value received is a PDIN. If the PDIN Flag is N, the value received is a DIN.                                                                                                                                     |
| Form (only for diabetic and respiratory drugs)                         | A pharmaceutical dosage form description of drug products used within the CIHI database. It is derived from the Health Canada dosage form and modified using predetermined form-mapping rules to ensure standard reporting. For more information, see the CIHI Pharmaceutical Form Mapping<br>For PDINs, this data element will be reported as blank.<br><br>( <a href="https://www.cihi.ca/en/system/files/document/pharmaceutical_mapping2008_en.pdf">https://www.cihi.ca/en/system/files/document/pharmaceutical_mapping2008_en.pdf</a> ) document. |
| Route of administration (only for diabetic and respiratory drugs)      | The route of administration for the drug as reported in Health Canada Drug product Database.<br>For PDINs, this data element will be reported as blank.                                                                                                                                                                                                                                                                                                                                                                                                |
| Strength (only for diabetic)                                           | Standardized strength of a DIN for use in establishing the CIHI Uniform Description.                                                                                                                                                                                                                                                                                                                                                                                                                                                                   |

|                                       |                                                                                                                                                                                                |
|---------------------------------------|------------------------------------------------------------------------------------------------------------------------------------------------------------------------------------------------|
| and respiratory drugs)                |                                                                                                                                                                                                |
| # of Claims Accepted                  | The number of claims where the public plan/program accepted at least part of the claim, either toward a deductible (if applicable) or for payment for the given drug class.                    |
| # of Active Beneficiaries             | The number of people from whom the public plan/program has accepted at least part of at least one claim for the given drug class, either toward a deductible (if applicable) or for payment.   |
| # of Paid Beneficiaries               | The number of people for whom the public plan/program paid at least part of at least 1 claim for the given drug class.                                                                         |
| Program Paid Amount                   | The Amount from the total prescription cost accepted that is paid by the plan/program for the given drug class.                                                                                |
| # of active beneficiaries (all drugs) | The number of individuals from whom the public plan/program has accepted at least part of at least one claim, either toward a deductible (if applicable) or for payment, for any drug product. |
| # of paid beneficiaries (all drugs)   | The number of people for whom the public plan/program paid at least part of at least 1 claim for any drug product.                                                                             |
| # of Claims Accepted (all drugs)      | The number of claims where the public plan/program accepted at least part of the claim, either toward a deductible (if applicable) or for payment any drug.                                    |
| Program Paid Amount (all drugs)       | The Amount from the total prescription cost accepted is paid by the plan/program for any drug product.                                                                                         |

**Table S2: Top changes in asthma publicly covered prescription use volumes and plan expenditures pre-post policy changes**

| Ingredient-parameter                | Period: no. of prescriptions and costs (monthly mean, %) change |                              |          |                              |          |
|-------------------------------------|-----------------------------------------------------------------|------------------------------|----------|------------------------------|----------|
|                                     | Before 1 <sup>st</sup> policy                                   | After 1 <sup>st</sup> policy | % change | After 2 <sup>nd</sup> policy | % change |
| Total no. beneficiaries             | 1864796 (77700)                                                 | 8314971(554331)              | +613.4   | 1822971 (260424)             | -53.0    |
| Prescriptions                       |                                                                 |                              |          |                              |          |
| Overall prescriptions               | 6126278 (255262)                                                | 15280827 (1018722)           | +299.1   | 3462439 (494634)             | -51.5    |
| Rate of use per 1000                | 756 (0.756)                                                     | 2952 (2.952)                 |          | 1421 (1.421)                 |          |
| Overall plan costs                  | \$378864749 (15786031)                                          | \$838556189(55903746)        | +254.1   | \$203827168(29118167)        | -47.9    |
| Rate of cost per 1000               | \$162018 (46.02)                                                | \$162018 (162.02)            |          | \$1606 (1.61)                |          |
| Prescriptions (Asthma)              |                                                                 |                              |          |                              |          |
| Overall prescriptions               | 408517 (17022)                                                  | 1617430 (107829)             | +533.5   | 307354 (43908)               | -59.3    |
| Rate of use per 1000                | 50.5 (0.050395126)                                              | 313 (0.312504528)            |          | 26.2 (0.12614199)            |          |
| Beclomethasone-R01AD01              | 6149 (256)                                                      | 18237(1216)                  | +375     | 4152 (593)                   | -51.2    |
| Beclometasone-R03BA01               | 3790 (158)                                                      | 15457 (1030)                 | +551.9   | 2204 (315)                   | -69.4    |
| Budesonide-R01AD05                  | 8632 (360)                                                      | 47245 (3150)                 | +775     | 11194 (1599)                 | -49.2    |
| Budesonide-R03BA02                  | 3526 (147)                                                      | 9673 (645)                   | +338.8   | 1577 (225)                   | -65.1    |
| Fluticasone-R03BA05                 | 90672 (3778)                                                    | 417072 (27805)               | +636     | 66651 (9522)                 | -65.8    |
| Ciclesonide-R01AD13                 | 36516 (1522)                                                    | 64866 (4324)                 | +184.1   | 34324 (4903)                 | -13.3    |
| Ciclesonide-R03BA08                 | 9176 (382)                                                      | 39957 (2664)                 | +597.4   | 5190 (741)                   | -72.2    |
| Mometasone-R03BA07                  | 51 (2)                                                          | 1369 (91)                    | +4450    | 46 (7)                       | -92.3    |
| Salbutamol-R03AC02                  | 183504 (7646)                                                   | 783621 (52241)               | +585     | 133055 (19008)               | -12.5    |
| Terbutaline-R03AC03                 | 1420 (59)                                                       | 6233 (416)                   | +605.1   | 815 (116)                    | -72.1    |
| Salmeterol and Fluticasone R03AK06  | 11039 (460)                                                     | 30282 (2019)                 | +338.9   | 5265 (752)                   | -62.8    |
| Vilanterol and Fluticasone- R03AK10 | 617 (26)                                                        | 7921 (528)                   | +1930.7  | 1635 (234)                   | -55.7    |
| Formoterol and Budesonide-R03AK07   | 8863 (369)                                                      | 37085 (2472)                 | +569.9   | 7593 (1085)                  | -56.1    |

Appendix 1, as supplied by the authors. Appendix to: Miregwa BN, Holbrook A, Law MR, et al. The impact of OHIP+ 2 pharmacare on use and costs of public drug plans among children and youth in Ontario: a time-series analysis. *CMAJ Open* 2022. DOI:10.9778/cmajo.20210295. Copyright © 2022 The Author(s) or their employer(s). To receive this resource in an accessible format, please contact us at [cmajgroup@cmaj.ca](mailto:cmajgroup@cmaj.ca).

|                                      |                       |                        |          |                        |       |
|--------------------------------------|-----------------------|------------------------|----------|------------------------|-------|
| Formoterol&Mometasone-R03AK09        | 3733(156)             | 18618 (1241)           | +695.5   | 3513 (502)             | -59.5 |
| Ipratropium-R03BB01                  | 795 (33)              | 3146 (210)             | +536.4   | 529 (76)               | -63.8 |
| Montelukast-R03DC03                  | 5445 (227)            | 15407 (1027)           | +352.4   | 2482 (355)             | -65.4 |
| Orciplenaline-R03CB03                | 4828 (201)            | 19783 (1319)           | +556.2   | 4559 (651)             | -50.6 |
| Dornase Alpha-R05CB13                | 962 (40)              | 2023 (135)             | +237.5   | 252 (36)               | -73.3 |
| Dextromerthaphan-R05DA09             | 15702 (654)           | 31652 (2110)           | +222.6   | 11900 (1700)           | -19.4 |
| Diphenhydramine-R06AA02              | 8003 (333)            | 17651 (735)            | +120.7   | 5012 (716)             | -2.6  |
| Hydrocodone-R05DA03                  | 4505 (188)            | 21792 (1453)           | +672.8   | 4317 (617)             | -57.5 |
| Codeine-R05DA04                      | 439 (18)              | 1772 (118)             | +555.5   | 186 (27)               | -77.1 |
| Omalizumab-R03DX05                   | 28 (1)                | 2704 (180)             | +17900   | 552 (79)               | -56.1 |
| Ivacafter-R07AX02                    | 99 (4)                | 260 (17)               | +325     | 0 (0)                  | -100  |
| Aerochamber space-Z99RA              | 0 (0)                 | 185892 (12393)         |          | 23468 (3353)           | -72.9 |
| Overall plan costs.                  | \$15731734 (\$655489) | \$67238185 (\$4482546) | +583.8   | \$12598120 (\$1799731) | -19.7 |
| Rate of use per 1000                 | \$1940 (\$1.94)       | \$12990 (\$12.99)      | +570     | \$5170 (\$5.17)        | -60.2 |
| Beclomethasone-R01AD01               | \$122363 (5098)       | \$405212 (27014)       | +429.9   | \$92358 (13194)        | -51.2 |
| Beclametasone-R03BA01                | \$250317 (10430)      | \$1121540 (74769)      | +616.9   | \$164383 (23483)       | -68.6 |
| Budesonide-R01AD05                   | \$172632 (7193)       | \$1095071 (73005)      | +914.9   | \$ 242762.2 (34680)    | -52.5 |
| Budesonide-R03BA02                   | \$250021 (10418)      | \$595913 (39728)       | +281.3   | \$94623 (13518)        | -66.0 |
| Fluticasone-R03BA05                  | \$4875066 (203128)    | \$23343277 (1556219)   | +666.1   | \$3897955 (556851)     | -64.2 |
| Ciclesonide-R01AD13                  | \$1149776.4 (47907.4) | \$2291242.7 (152749.5) | +218.8   | \$1264963.4 (180709.1) | -1.8  |
| Ciclesonide-R03BA08.                 | \$711651 (29652)      | \$ 3273336 (218222)    | +635.9   | \$433617 (61945)       | -71.6 |
| Mometasone-R03BA07                   | \$ 2456 (102)         | \$75830 (5055)         | +4855.9  | \$2344 (335)           | -93.4 |
| Salbutamol-R03AC02                   | \$2368844 (98702)     | \$11724678 (781645)    | +691.9   | \$2003273 (286182)     | -63.4 |
| Terbutaline-R03AC03                  | \$23422 (976)         | \$102430 (6829)        | +599.7   | \$15934 (2276)         | -66.7 |
| Salmeterol and Fluticasone-R03AK06   | \$1486467 (61936)     | \$4431383 (295426)     | +377     | \$789896 (112842)      | -61.8 |
| Vilanterol and Fluticasone – R03AK10 | \$81931 (3414)        | \$1185960 (79064)      | +2215.8  | \$258278 (36897)       | -53.3 |
| Formoterol and Budesonide R03AK07    | \$ 922022 (38418)     | \$4279245 (285283)     | + 642.6  | \$890443 (127206)      | -55.4 |
| Formoterol & mometasone R03AK09      | \$475305 (19804)      | \$2505775 (167052)     | +743.5   | \$487750 (69679)       | -88.1 |
| Ipratropium-R03BB01                  | \$25720 (1072)        | \$6827 (102403)        | +9452    | \$17331 (2476)         | -97.6 |
| Tiotropium-R03BB04                   | \$8005 (334)          | \$79666 (5311)         | +1490    | \$17742 (2535)         | -52.3 |
| Montelukast-R03DC03                  | \$121518 (5063)       | \$375280 (25019)       | +394.2   | \$59781 (8540)         | -65.9 |
| Orciplenaline-R03CB03                | \$67918 (2830)        | \$321932 (21462)       | +658.4   | \$71892 (10270)        | -52.1 |
| Dornase Alpha-R05CB13                | \$1571063 (65461)     | \$3657515 (243834)     | + 272.4  | \$496557 (70937)       | -70.9 |
| Dextromerthaphan-R05DA09             | \$157307 (6554)       | \$378729 (25249)       | +285.2   | \$141932 (20276)       | -19.7 |
| Diphenhydramine-R06AA02              | \$779522 (32480)      | \$1199368 (79958)      | +146.2   | \$311338 (44476)       | -44.4 |
| Hydrocodone-R05DA03                  | \$61268 (2553)        | \$327702 (21847)       | +755.7   | \$66061 (9437)         | -56.8 |
| Codeine-R05DA04                      | \$5116 (213)          | \$21585 (1439)         | +575.5   | \$2183 (312)           | -78.3 |
| Omalizumab-R03DX05                   | \$41642 (1735)        | \$ 4183232 (278882)    | +15973.8 | \$765228 (109318)      | -60.8 |
| Ivacafter-R07AX02                    | \$807113 (33630)      | \$2058609 (137241)     | +308.1   | \$0 (0)                | -100. |
| Aerochamber space-Z99RA              | \$0 (0)               | \$8547799 (569853)     |          | \$1075567 (153652)     | -73.0 |

**Table S3: Top changes in diabetes publicly covered prescription use volumes and plan expenditure pre-post policy change**

| Ingredient-parameter            | Period: no. of prescriptions and costs (%) change |                              |          |                              |          |
|---------------------------------|---------------------------------------------------|------------------------------|----------|------------------------------|----------|
|                                 | Before 1 <sup>st</sup> policy                     | After 1 <sup>st</sup> policy | % change | After 2 <sup>nd</sup> policy | % change |
| <b>Total no. beneficiaries</b>  | 1864796 (77700)                                   | 8314971(554331)              | +613.4   | 1822971 (260424)             | -53.0    |
| <b>Prescriptions</b>            |                                                   |                              |          |                              |          |
| Overall prescriptions           | 6126278 (255262)                                  | 15280827 (1018722)           | +299.1   | 3462439 (494634)             | -51.5    |
| Rate of use per 1000            | 756 (0.756)                                       | 2952 (2.952)                 |          | 1421 (1.421)                 |          |
| Overall plan costs              | \$378864749(15786031)                             | \$838556189(55903746)        | +254.1   | \$203827168 (29118167)       | -47.9    |
| Rate of cost per 1000           | \$46020 (46.02)                                   | \$162018 (162.02)            |          | \$1606 (1.61)                |          |
| <b>Prescriptions (Diabetes)</b> |                                                   |                              |          |                              |          |
| Overall prescriptions           | 69598 (2900)                                      | 172492 (11499)               | +296.5   | 36471 (5210)                 | -54.7    |
| Rate of use per 1000            | 8.58 (0.00858)                                    | 33.3 (0.03333)               |          | 14.9 (0.01497)               |          |

Appendix 1, as supplied by the authors. Appendix 2: Miregwa BN, Holbrook A, Law MR, et al. The impact of OHIP+ 3 pharmacare on use and costs of public drug plans among children and youth in Ontario: a time-series analysis. *CMAJ Open* 2022. DOI:10.9778/cmajo.20210295. Copyright © 2022 The Author(s) or their employer(s). To receive this resource in an accessible format, please contact us at [cmajgroup@cmaj.ca](mailto:cmajgroup@cmaj.ca).

|                                   |                    |                       |         |                      |       |
|-----------------------------------|--------------------|-----------------------|---------|----------------------|-------|
| <b>Insulin (A10A)</b>             | 5391841 (224660)   | 17459280 (1163952)    | +418.1  | 3297138 (471020)     | -59.5 |
| Insulin Aspart -A10AB05           | 18554 (773)        | 57313 (3821)          | +394.3  | 8863 (1266)          | -66.9 |
| Insulin Glargine - A10AE04.       | 12159 (507)        | 29401 (1960)          | +286.6  | 5192 (742)           | -62.1 |
| Insulin Lispro -A10AB04           | 10605 (442)        | 31924 (2128)          | +381.4  | 5214 (745)           | -65.0 |
| Insulin(humansusp)-<br>A10AC01    | 5311 (221)         | 7645 (510)            | +130.8  | 1239 (177)           | -65.3 |
| Insulin Glulisine - A10AB06       | 340 (14)           | 1818 (121)            | +764.3  | 318 (45)             | -62.8 |
| Insulin Detemir- A10AE05          | 3576 (149)         | 6128 (409)            | +174.5  | 840 (120)            | -70.7 |
| <b>Blood GL meds- (A10B)</b>      | 414747 (17281)     | 1092027 (72802)       | +321.3  | 330960 (47280)       | -35.1 |
| Metformin-A10BA02                 | 14232 (593)        | 25542 (1703)          | +187.2  | 8727 (1247)          | -26.8 |
| Metformin sitagliptin-<br>A10BD07 | 1270 (53)          | 2731 (182)            | +243.4  | 1106 (158)           | -13.2 |
| Glaclazide-A10BB09                | 1341 (56)          | 2034 (136)            | +142.9  | 892 (127)            | -6.6  |
| Sitagliptin-A10BH01.              | 954 (40)           | 1116 (74)             | +85.0   | 429 (61)             | -17.6 |
| Canagliflozin-A10BK02             | 1072 (45)          | 906 (60)              | +33.0   | 211 (30)             | -50.0 |
| empagliflozin-A10BK03.            | 98 (4)             | 1596 (106)            | +2500   | 655 (94)             | -11.3 |
| teststrips-Z99AA                  | 36029 (1501)       | 87831 (5855)          | +290.1  | 14272 (2039)         | -65.2 |
| Overall plan costs.               | \$5806588 (241941) | \$18551307 (1236754)  | +411.2  | \$3628098 (518300)   | -58.1 |
| Rate of use per 1000              | \$716.31 (0.71631) | \$3584.3(3,58431)     |         | \$1489.02 (1.48902)  |       |
| <b>Insulin (A10A)</b>             | \$5391841 (224660) | \$ 17459280 (1163952) | +418.1  | \$3297138 (471020)   | -59.5 |
| Insulin aspart -A10AB05           | \$1804849 (75202)  | \$6758411 (450561)    | +499.1  | \$1066830 (152404)   | -66.2 |
| Insulin Glargine - A10AE04        | \$1641723 (68405)  | \$4570759 (304717)    | +345.5  | \$824965<br>(117852) | -61.3 |
| Insulin lispro -A10AB04           | \$924483 (38520)   | \$3513537 (234236)    | +508.1  | \$588106 (84015)     | -64.1 |
| Insulin(humansusp)-<br>A10AC01    | \$379536 (15814)   | \$615104 (41007)      | +159.3  | \$103675 (14811)     | -63.9 |
| Insulin detemir- A10AE05          | \$606615 (25276)   | \$1135139 (75676)     | +199.4  | \$157560 (22509)     | -70.3 |
| Insulin Glulisine - A10AB06       | \$28803 (1200)     | \$173455 (11564)      | +863.7  | \$32635 (4662)       | -59.7 |
| BGLM - A10B                       | \$414747 (17281)   | \$1092027 (72802)     | +321.3  | \$330960 (47280)     | -35.1 |
| Metformin-A10BA02                 | \$122944 (5123)    | \$252900 (16860)      | +229.1  | \$71455 (10208)      | -39.5 |
| Metformin-sitagliptin-<br>A10BD07 | \$112213 (4676)    | \$325714 (21714)      | +364.3  | \$115665 (16524)     | -23.9 |
| Glaclazide-A10BB09                | \$14298 (596)      | \$21832 (1455).       | +144.1  | \$8306 (1187)        | -18.4 |
| Sitagliptin-A10BH01.              | \$ 81059(3377)     | \$ 156011 (10401)     | +207.9  | \$50930 (7276)       | -30.1 |
| Canagliflozin-A10BK02             | \$70096 (2921)     | \$89951 (5997)        | +105.3  | \$18797 (2685)       | -55.2 |
| Empagliflozin-A10BK03.            | \$8785 (366)       | \$176536 (11769)      | +3100.2 | \$56926 (8132)       | -30.9 |
| Dapagliflozin-A10BK01             | \$3856 (161)       | \$51501 (3433)        | +2032.2 | \$5075 (725)         | -78.9 |
| Teststrips-Z99AA                  | \$4513868 (188078) | \$13466558 (897771)   | +377.3  | \$2063280 (294754)   | -67.2 |

Figure S1: Average monthly number of prescriptions where at least a portion was paid by the benefits plan, before and after the first and second OHIP+ policy intervention changes in January 2018 and April 2019. The solid lines represent the estimated monthly rates, and dashed lines (counterfactual) represent predicated estimates.

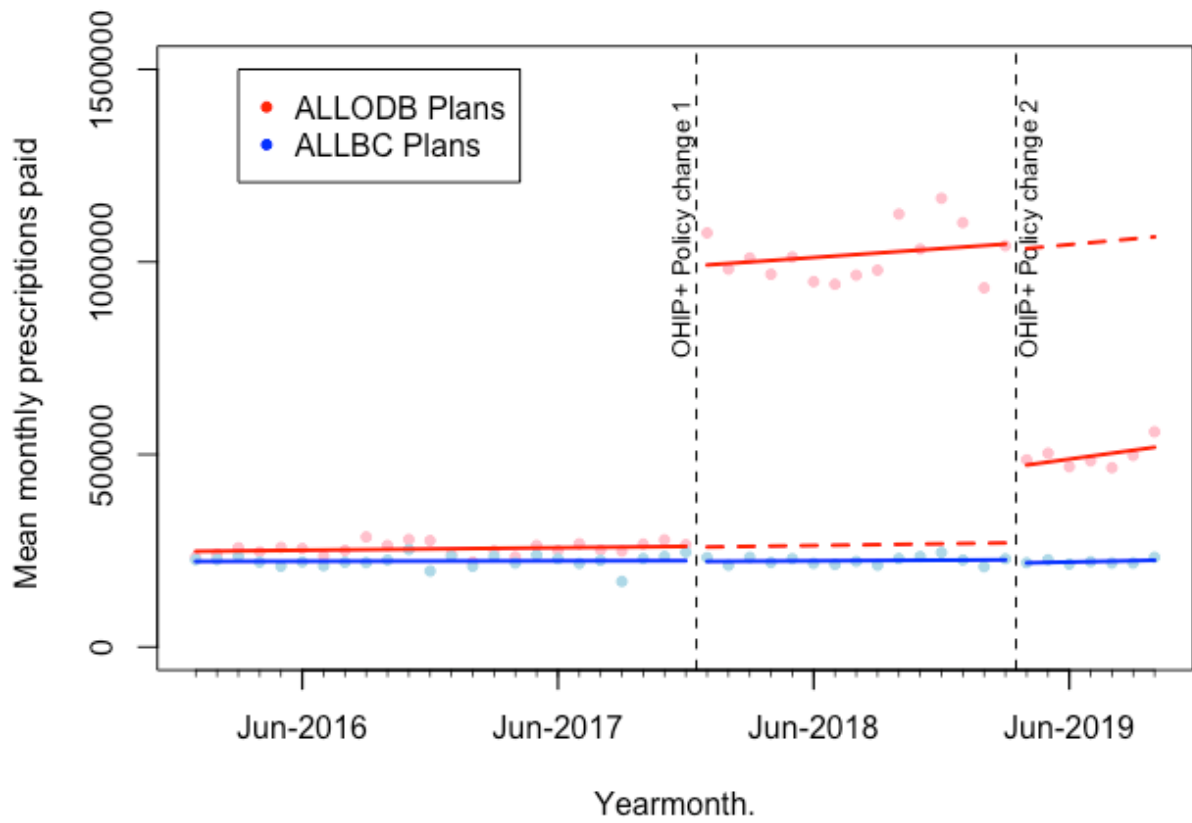

Figure S2: Interrupted time-series analysis of overall reimbursed dollars per month before and after the first and second OHIP+ policy intervention changes in January 2018 and April 2019. The solid lines represent the estimated monthly rates, and dashed lines (counterfactual) represent predicated estimates.

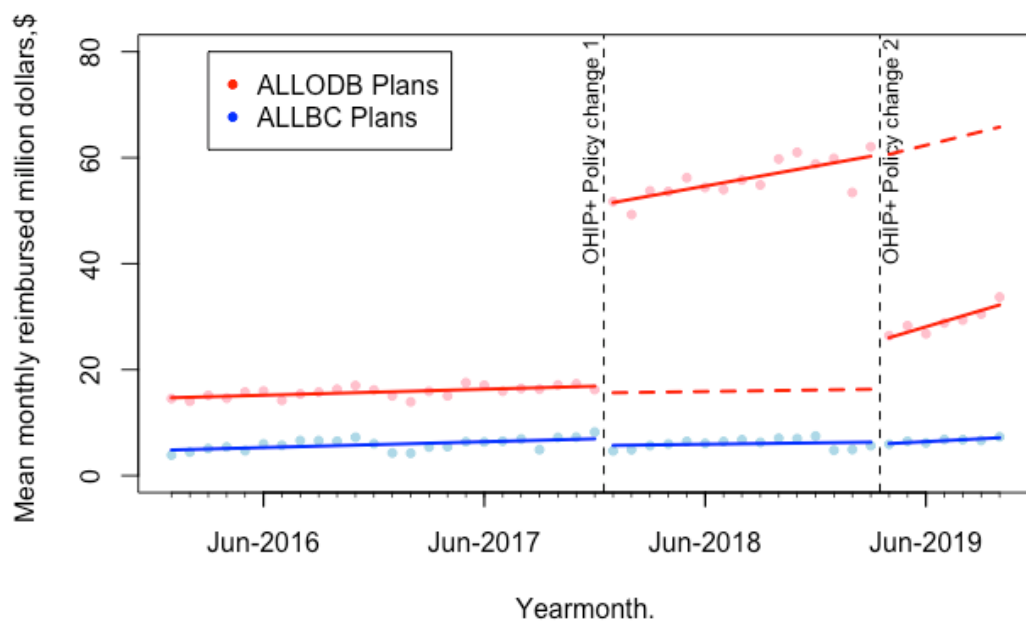

Figure S3: Average monthly number of asthma medication prescriptions per person per population where at least a portion was paid by the benefits plan, before and after the first and second OHIP+ policy intervention changes in January 2018 and April 2019. The solid lines represent the estimated monthly rates, and dashed lines (counterfactual) represent predicted estimates.

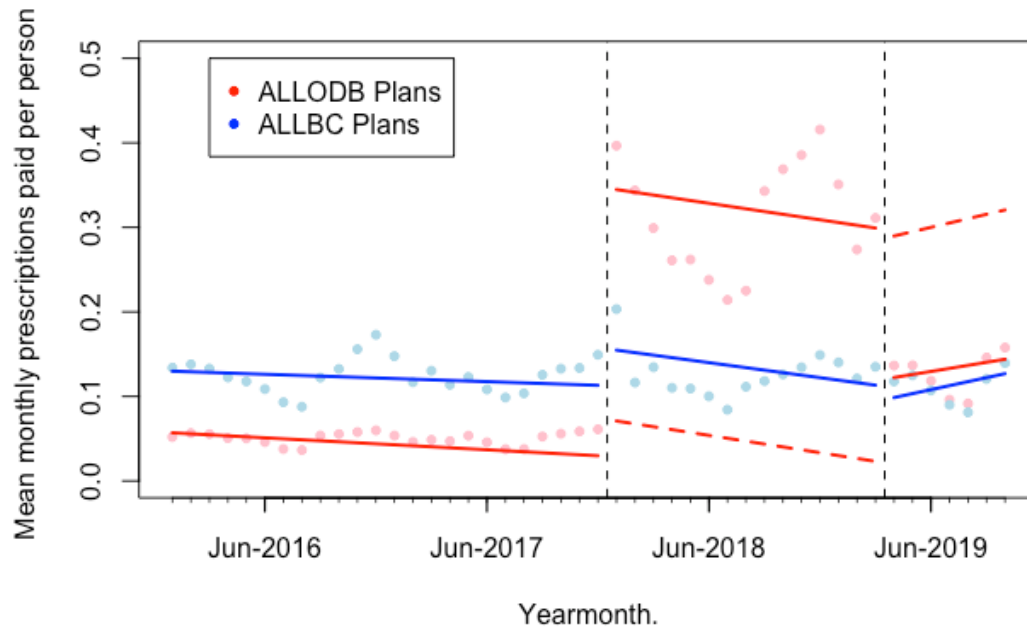

Figure S4: Interrupted time-series analysis of asthma medication reimbursed dollars per person per population before and after the first and second OHIP+ policy intervention changes in January 2018 and April 2019. The solid lines represent the estimated monthly rates, and dashed lines (counterfactual) represent predicted estimates.

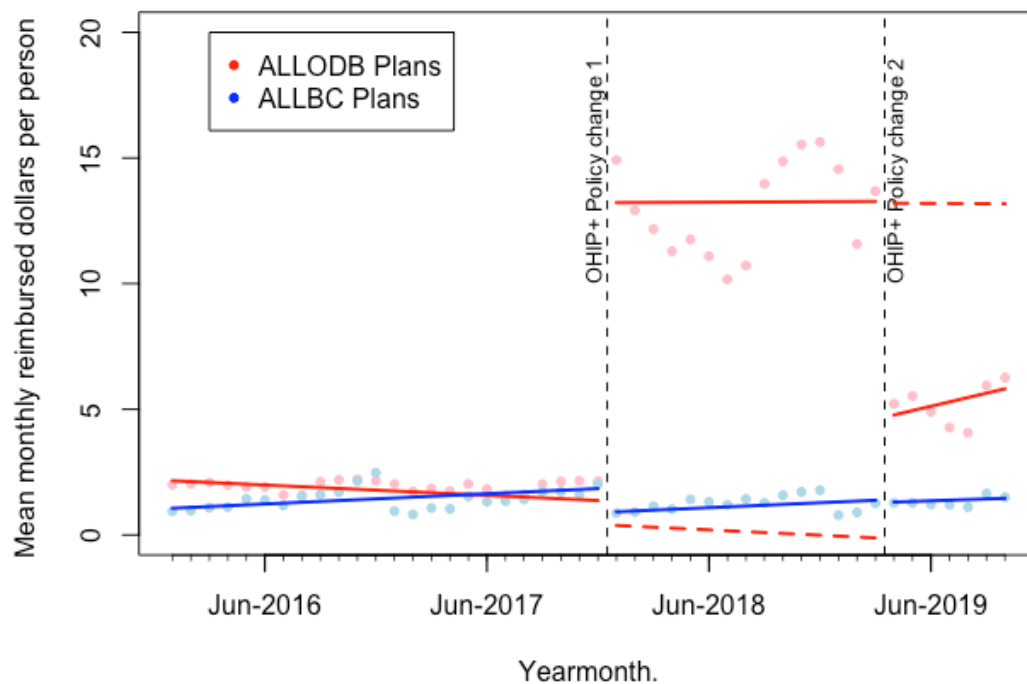

Figure S5: Average monthly number of diabetes publicly covered prescriptions per person per population where at least a portion was paid by the benefits plan, before and after the first and second OHIP+ policy intervention changes in January 2018 and April 2019. The solid lines represent the estimated monthly rates, and dashed lines (counterfactual) represent predicted estimates.

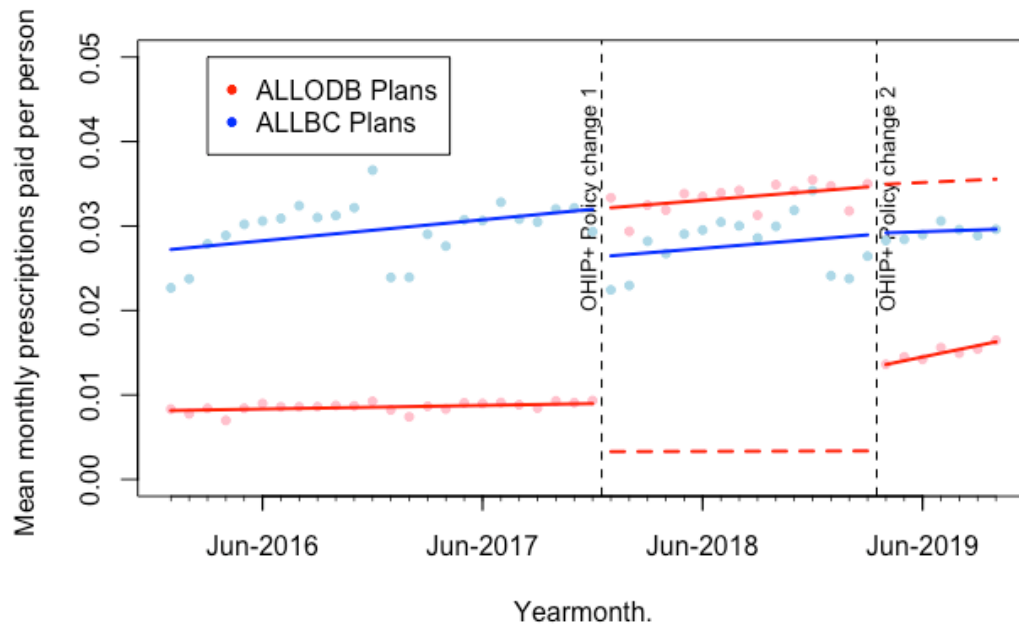

Figure S6: Interrupted time-series analysis of diabetes publicly covered medication reimbursed dollars per person per population before and after the first and second OHIP+ policy intervention changes in January 2018 and April 2019. The solid lines represent the estimated monthly rates, and dashed lines (counterfactual) represent predicted estimates.

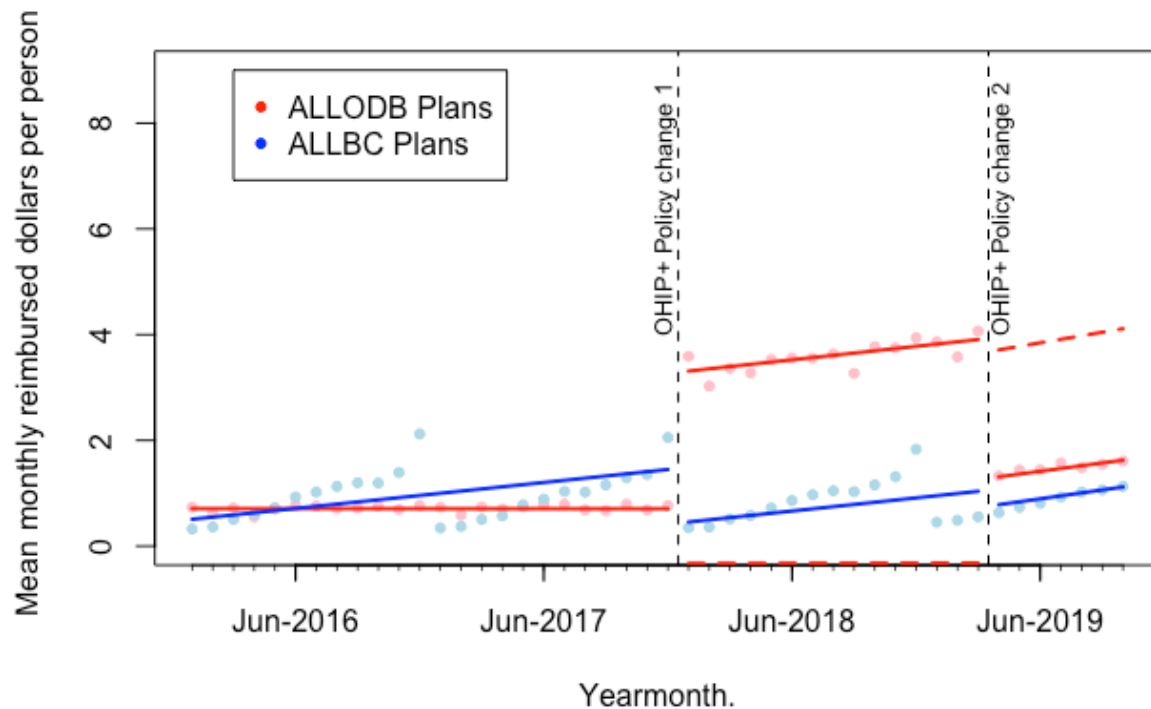

Supplement: open-2021-0295-1-at.pdf [file open-2021-0295-1-at.pdf]
